# Supplementary material for: TR4 nuclear receptor enhances prostate cancer initiation via altering the stem cell population and EMT signals in the PPARG-deleted prostate cells
Source: PubMed Central journal article supplement (PMC4381707; doi:10.18632/oncoscience.121), 2015-02-09
Supplement: oncoscience-02-0142-s001.pdf [file oncoscience-02-0142-s001.pdf]

## TR4 nuclear receptor enhances prostate cancer initiation via altering the stem cell population and EMT signals in the PPARG-deleted prostate cells

### Supplementary Material

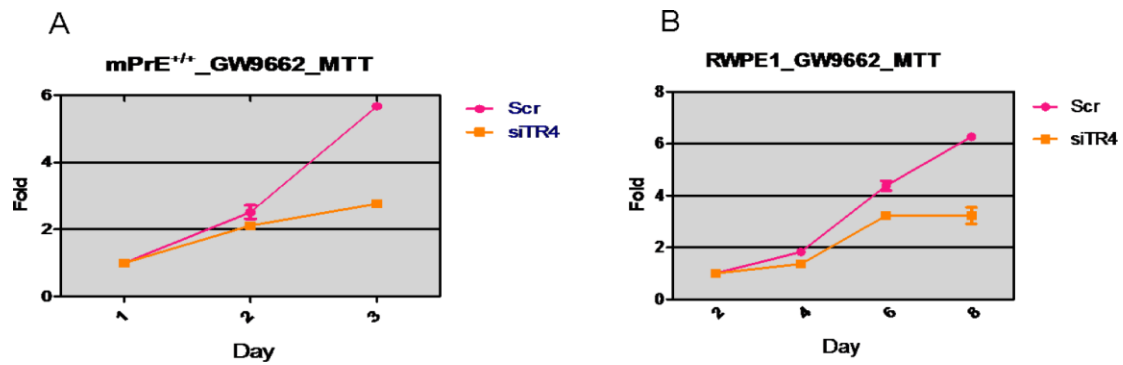

Figure S1: Knockdown TR4 suppresses mPrE<sup>+/+</sup> & RWPE1 cell growth following the PPARG specific antagonist treatment.
